# Supplementary material for: Roles of Arrest-Defective Protein 1225 and Hypoxia-Inducible Factor 1α in Tumor Growth and Metastasis
Source: PubMed Central journal article supplement — J Natl Cancer Inst. 2010 Mar 17;102(6):426–42. doi: 10.1093/jnci/djq026 (PMC2841038; doi:10.1093/jnci/djq026), 2010-03-17
Supplement: djq026_1.pdf [file djq026_1.pdf]

**Supplementary Table 1.** Effect of mARD1A<sup>225</sup> overexpression on number and size of polyps in different segments of the small intestine\*

| Mouse group                                | No. of mice | Duodenum      |                         |                                |        |        | Jejunum       |                         |                                |        |       | Ileum         |                         |                                |        |        |
|--------------------------------------------|-------------|---------------|-------------------------|--------------------------------|--------|--------|---------------|-------------------------|--------------------------------|--------|-------|---------------|-------------------------|--------------------------------|--------|--------|
|                                            |             | No. of tumors |                         | Distribution by tumor diameter |        |        | No. of tumors |                         | Distribution by tumor diameter |        |       | No. of tumors |                         | Distribution by tumor diameter |        |        |
|                                            |             | Total         | Mean per mouse (95%CI)† | <1mm‡                          | 1-2mm§ | >2mm** | Total         | Mean per mouse (95%CI)† | <1mm¶                          | 1-2mm† | >2mm‡ | Total         | Mean per mouse (95%CI)† | <1mm#                          | 1-2mm† | >2mm** |
| Apc <sup>Min/+</sup>                       | 25          | 296           | 11.8<br>(9.4 to 14.2)   | 14                             | 142    | 140    | 760           | 30.4<br>(25.4 to 35.4)  | 96                             | 484    | 180   | 1027          | 41.1<br>(34.2 to 48)    | 89                             | 681    | 257    |
| Apc <sup>Min/+</sup> /ARD1A <sup>225</sup> | 21          | 127           | 6.0<br>(4.8 to 7.2)     | 17                             | 69     | 41     | 338           | 16.1<br>(11.6 to 20.6)  | 103                            | 207    | 28    | 335           | 16.0<br>(11.8 to 20.2)  | 85                             | 219    | 31     |

\*Duodenum, jejunum, and ileum; CI = confidence interval. † $P < .001$ ; ‡ $P = .36$ ; § $P = .027$ ; \*\* $P = .001$ ; ¶ $P = .45$ ; # $P = .056$ , compared with Apc<sup>Min/+</sup> mice, determined with the two-sided Mann-Whitney U test.
